# Supplementary material for: Mathematical modeling to size anaerobic stabilization ponds intended for slaughterhouse wastewater treatment – the role of temperature and hydraulic retention time
Source: Royal Society of Chemistry journal article supplement (doi:10.1039/d4ew00557k), 2024-01-01
Supplement: d4ew00557k1.pdf [file d4ew00557k1.pdf]

### ELECTRONIC SUPPLEMENTARY INFORMATION (ESI)

Mathematical modeling to size anaerobic stabilization ponds intended for slaughterhouse wastewater treatment – the role of temperature and hydraulic retention time

#### Summary

1. Temperature ranges for anaerobic digestion - literature review (Table S1)
2.  $E_{\text{COD}}$  as a function of time ( $t_p$ ) for each studied temperature (Figure S1)
3. Individual asymptotic regression model as a function of temperature (Figure S2)
4. Simulation of  $E_{\text{BOD}}$  vs  $t_p$  for theoretical temperatures within the studied range using Equation 11 (Figure S3)
5. Example of application for SWWTP sizing using equations 11 and 13

Table S1 – Temperature (°C) ranges for anaerobic digestion

| Reference                     | Psychrophilic | Mesophilic | Thermophilic |
|-------------------------------|---------------|------------|--------------|
| (MATHERI et al., 2016)        | <20           | 30-42      | 43-55        |
| (SINDALL, 2014)               | < 20          | 30-40      | 50-60        |
| (ZHANG et al., 2014)          | 10-30         | 30-50      | 50-60        |
| (DENG et al., 2014)           | 15-25         | 35-37      | 55-60        |
| (YENIGÜN; DEMIREL, 2013)      | -             | 30-40      | 45-65        |
| (DROSG, 2013)                 | -             | 36-43      | 50-65        |
| (MANYI-LOH et al., 2013)      | < 20          | 25-37      | 55-65        |
| (TORTORA; FUNKE; CASE, 2012)  | < 20          | 20-40      | 45-70        |
| (VINDIS et al., 2009)         | 12-16         | 35-37      | 55-60        |
| (AL SEADI et al., 2008)       | < 25          | 25-45      | 45-70        |
| (DEUBLEIN; STEINHAUSER, 2008) | < 25          | 25-45      | > 65         |

|                             |      |       |       |
|-----------------------------|------|-------|-------|
| (EL-MASHAD; ZHANG, 2010)    | < 25 | 25-40 | > 65  |
| (ANGELIDAKI; SANDERS, 2004) | < 20 | 25-40 | 45-60 |
| (BURKE, 2001)               | < 20 | 20-40 | 43-71 |

SELORMEY, G. K. et al. A review of anaerobic digestion of slaughterhouse waste: effect of selected operational and environmental parameters on anaerobic biodegradability. **Reviews in Environmental Science and Biotechnology**, Springer Science and Business Media B.V., 1 dec. 2021.

Figure S1 -  $E_{\text{COD}}$  as a function of  $t_p$  (days) for all studied temperatures ( $^{\circ}\text{C}$ )

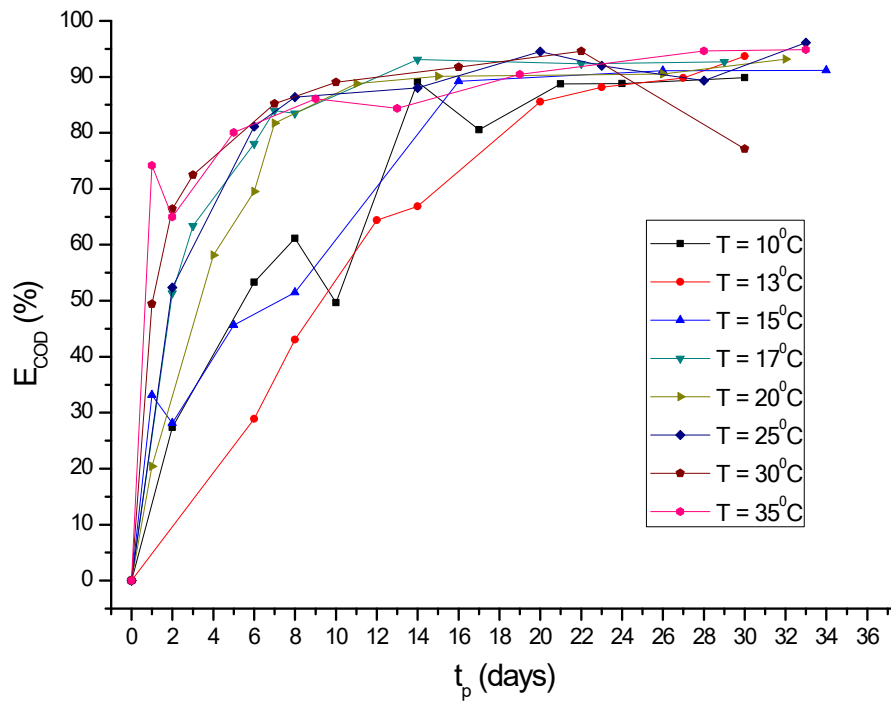

Figure S2 - Individual asymptotic regression model as a function of temperature (Figure S2)

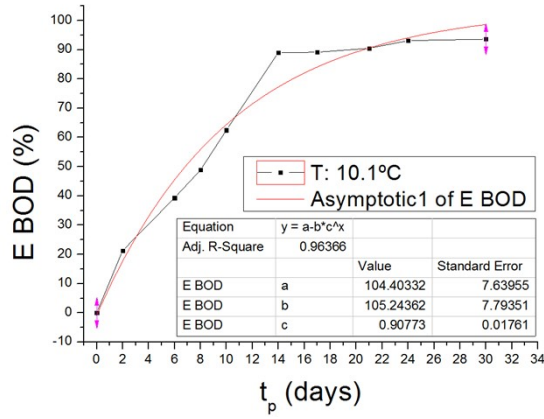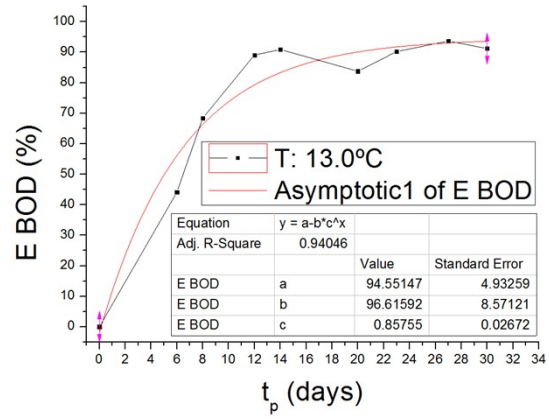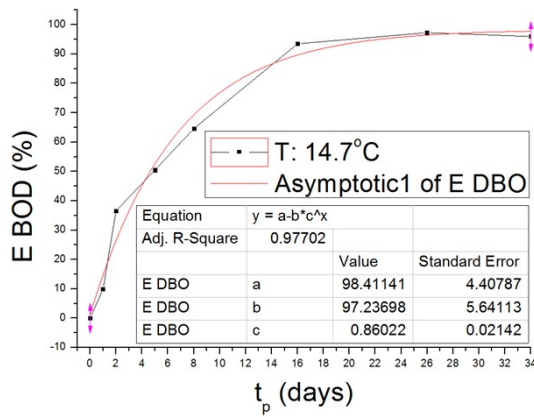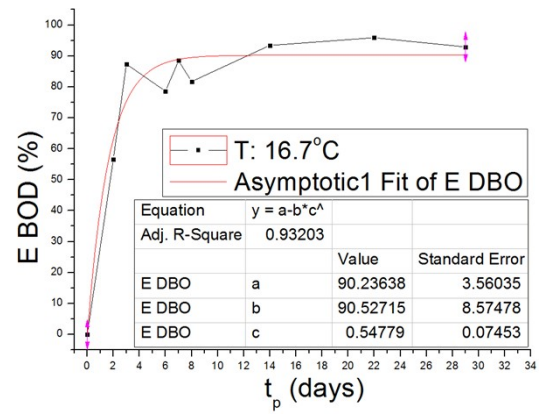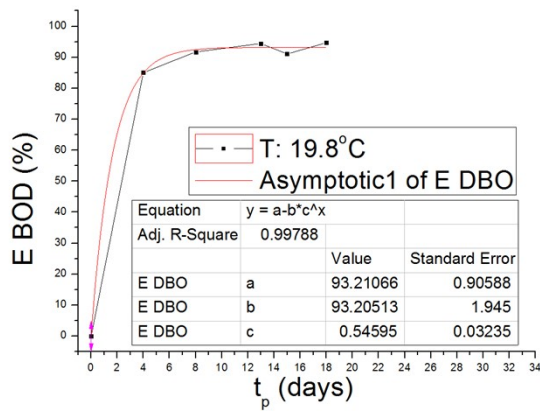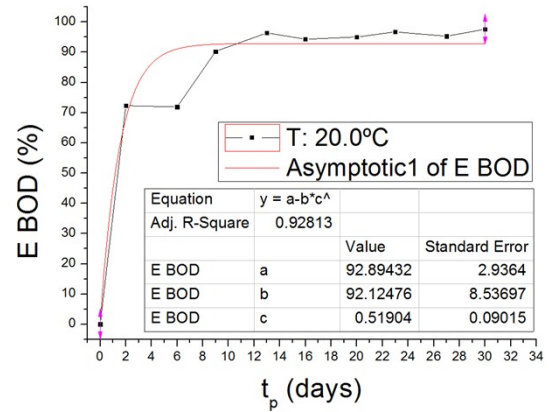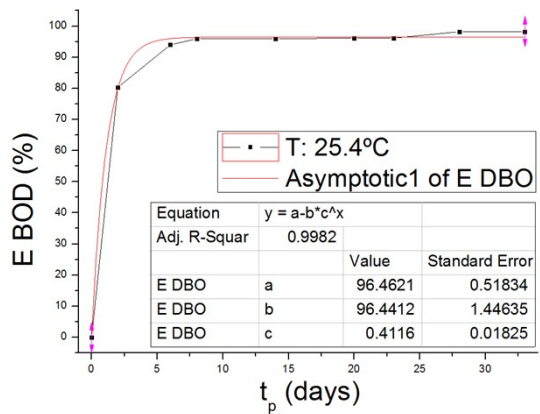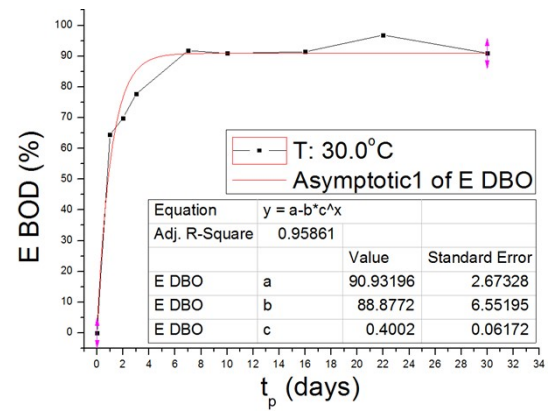

Figure S2 - Individual asymptotic regression model as a function of temperature (Figure S2) - continuation

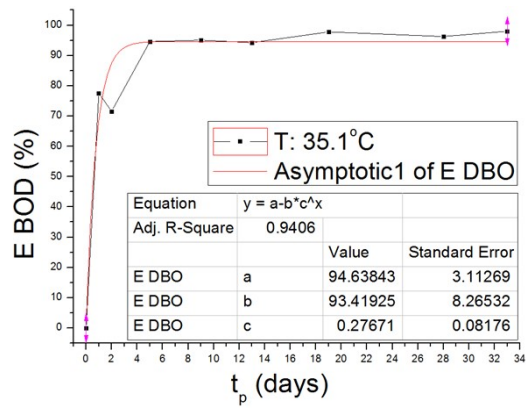

Figure S3 - Simulation of  $E_{BOD}$  vs  $t_p$  for theoretical temperatures within the studied range using the Equation 11

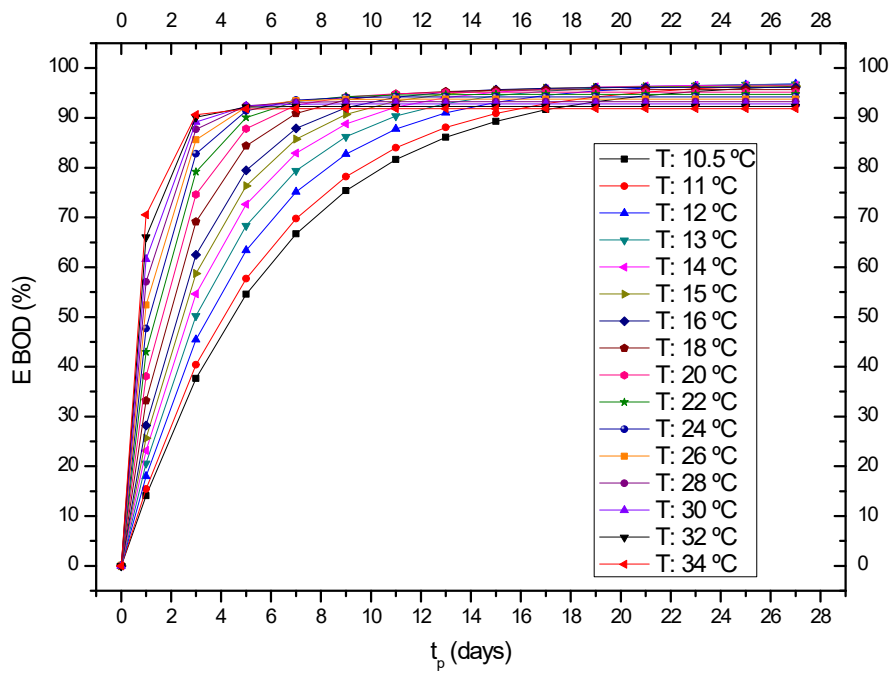

**EXAMPLE OF APPLICATION: USE OF PROPOSED MODEL FOR SWWTP DIMENSIONING.**

A certain slaughterhouse has the capacity of 750 slaughters per day (preliminary project estimation), generating a contribution of 2,000 L of effluent *per capita*. Admitting a safety factor of 25%, wastewater production is estimated in 1,875 m<sup>3</sup> day<sup>-1</sup>. BOD concentration of raw wastewater is 1,200 mg O<sub>2</sub> L<sup>-1</sup>. Average temperature for the coldest month is 16 °C. The environmental legislation preconizes a minimum BOD organic load removal of 95% before discharge into natural waterbodies. How could the constructive project of a SWWTP be for meeting this demand?

**ANSWER:**

**INPUT DATA:**

T (average air temperature): 16 °C;  
 Q (input flow): 1,875 m<sup>3</sup> day<sup>-1</sup>;  
 S<sub>0</sub> (input BOD): 1,200 mg O<sub>2</sub> L<sup>-1</sup>, or simply mg L<sup>-1</sup>;  
 E<sub>BOD</sub> : 95% BOD removal;  
 HRT<sub>total</sub> ≡ t<sub>p</sub> (days);

**a) Estimating the total hydraulic retention time (HRT<sub>total</sub>) using the proposed model (Equation 13):**

$$HRT_{total}(days) = \frac{\left\{ \log \left[ - \frac{E_{BOD} - (100 - 0.24T)}{(102 - 0.34T)} \right] \right\}}{\log(1.12 - 0.026T)}$$

$$HRT_{total}(days) = \frac{\left\{ \log \left[ - \frac{95 - (100 - 0.24 * 16)}{(102 - 0.34 * 16)} \right] \right\}}{\log(1.12 - 0.026 * 16)}$$

$$HRT_{total}(days) = \frac{\left\{ \log \left[ - \frac{95 - (96 * 16)}{(97)} \right] \right\}}{\log(0.704)}$$

$$HRT_{total}(days) = \frac{\log(0.012)}{\log(0.704)} = 12.7 days$$

**b) Calculating the total SWWTP volume (Equation 14):**

$$V_{total} = HRT_{Total} \times Q$$

$$V_{total} = 12.6 * 1,875 = 23.6 m^3$$

**c) Determining how many ponds (n) will be constructed:**

Considering field characteristics, 4 equivalent ponds (opted by the user).

**d) Determining individual volume of each pond**

$$\text{Admitting 4 equivalent ponds, } V_n = \frac{23.6}{4} = \mathbf{5,900 m^3}$$

**e) Estimating the accumulated HRT (HRT<sub>n</sub>) for each pond in the system (for equivalent ponds):**

$$HRT_n = \frac{HRT_{total}}{n_{total}} \times n$$

In which *n* = position of the pond in the sequential system

Obs: for ponds with different dimensions, HRT<sub>n</sub> is calculated by summing the HDT of the individual predecessor ponds.

After the 1<sup>st</sup> pond (n = 1), HRT<sub>1</sub> = 3.2 days. For n = 2, HRT<sub>2</sub> = 6.4 days and so on, totaling HRT<sub>4</sub> = 12.7 after the 4th pond, disregarding little rounding calculations.

**f)** Estimating the accumulated BOD removal efficiency (E<sub>BOD, n</sub>) for each pond in the system, considering the proper HRT<sub>n</sub> (Equation 11):

$$E_{BOD, n} = (100 - 0.24T) - [(102 - 0.34T) \times (1.12 - 0.026T)^{HRT_n}]$$

Admitting T = 16 °C, for the first anaerobic pond (n = 1) the value of HRT<sub>1</sub> = 3.2 days and E<sub>BOD, 1</sub> = 64.3%. After the 2nd pond, the accumulated BOD removal is 85.5% and so on.

**g)** Calculating the output BOD (S<sub>out, n</sub>) for each pond:

$$S_n = S_0 - \left( S_0 \cdot \frac{E_{BOD, n}}{100} \right)$$

For the first pond, S<sub>out, 1</sub> = 428 mg L<sup>-1</sup>; after the 2nd pond, the residual BOD is S<sub>out, 2</sub> = 174 mg L<sup>-1</sup> and so on.

In summary, the performance of the anaerobic pond system is:

|                  | HRT <sub>acc</sub> (days) | E <sub>BOD, acc</sub> (%) | S <sub>out</sub> (mg L <sup>-1</sup> ) |
|------------------|---------------------------|---------------------------|----------------------------------------|
| Anaerobic pond 1 | 3.2                       | 64.3                      | 428                                    |
| Anaerobic pond 2 | 6.4                       | 85.5                      | 174                                    |
| Anaerobic pond 3 | 9.6                       | 92.7                      | 88                                     |
| Anaerobic pond 4 | 12.7                      | 95.0                      | 60                                     |
